# Supplementary material for: Molecular Determinants of Calcitriol Signaling and Sensitivity in Glioma Stem-like Cells
Source: MDPI journal article supplement (doi:10.3390/cancers15215249), 2023-10-31
Supplement: s1 [file s1]

## Supplementary Information

*Supplementary Table S1: Vitamin D receptor allele composition of GSC lines. For some samples, RFLP analysis did not work in the given time and information is therefore not available (N/A). Alleles are described by capital (homozygote for mutated restriction site) or small letters (homozygote for existing restriction site) or both (heterozygote for both).*

| Cell line       | FokI | BsmI | ApaI | TaqI | Genotype |
|-----------------|------|------|------|------|----------|
| high-responders |      |      |      |      |          |
| β4              | N/A  | N/A  | N/A  | N/A  | N/A      |
| GBM10           | FF   | Bb   | Aa   | tt   | BAt      |
| MNOF35          | Ff   | bb   | aa   | N/A  | baT      |
| MNOF76          | ff   | Bb   | Aa   | TT   | BAT      |
| GS-90           | ff   | BB   | AA   | tt   | BAt      |
| GS-101          | Ff   | bb   | Aa   | Tt   | bAT      |
| NCH481          | Ff   | bb   | aa   | TT   | baT      |
| NCH644          | Ff   | BB   | AA   | Tt   | BAt      |
| NCH663          | N/A  | N/A  | N/A  | N/A  | N/A      |
| non-responders  |      |      |      |      |          |
| PB1             | ff   | Bb   | AA   | TT   | bAT      |
| GS-3            | Ff   | BB   | AA   | tt   | BAt      |
| GS-73           | Ff   | Bb   | Aa   | Tt   | BAT      |
| GS-80           | FF   | bb   | AA   | TT   | bAT      |
| HROG52          | Ff   | Bb   | AA   | Tt   | BAT      |
| HROG63          | FF   | N/A  | N/A  | N/A  | N/A      |
| MNOF107         | N/A  | N/A  | N/A  | N/A  | N/A      |
| 17/02           | FF   | bb   | aa   | TT   | baT      |
