# Supplementary material for: Molecular Determinants of Calcitriol Signaling and Sensitivity in Glioma Stem-like Cells
Source: MDPI journal article supplement (doi:10.3390/cancers15215249), 2023-10-31
Supplement: s1 [file s1]

# Related to Figure 2

FokI

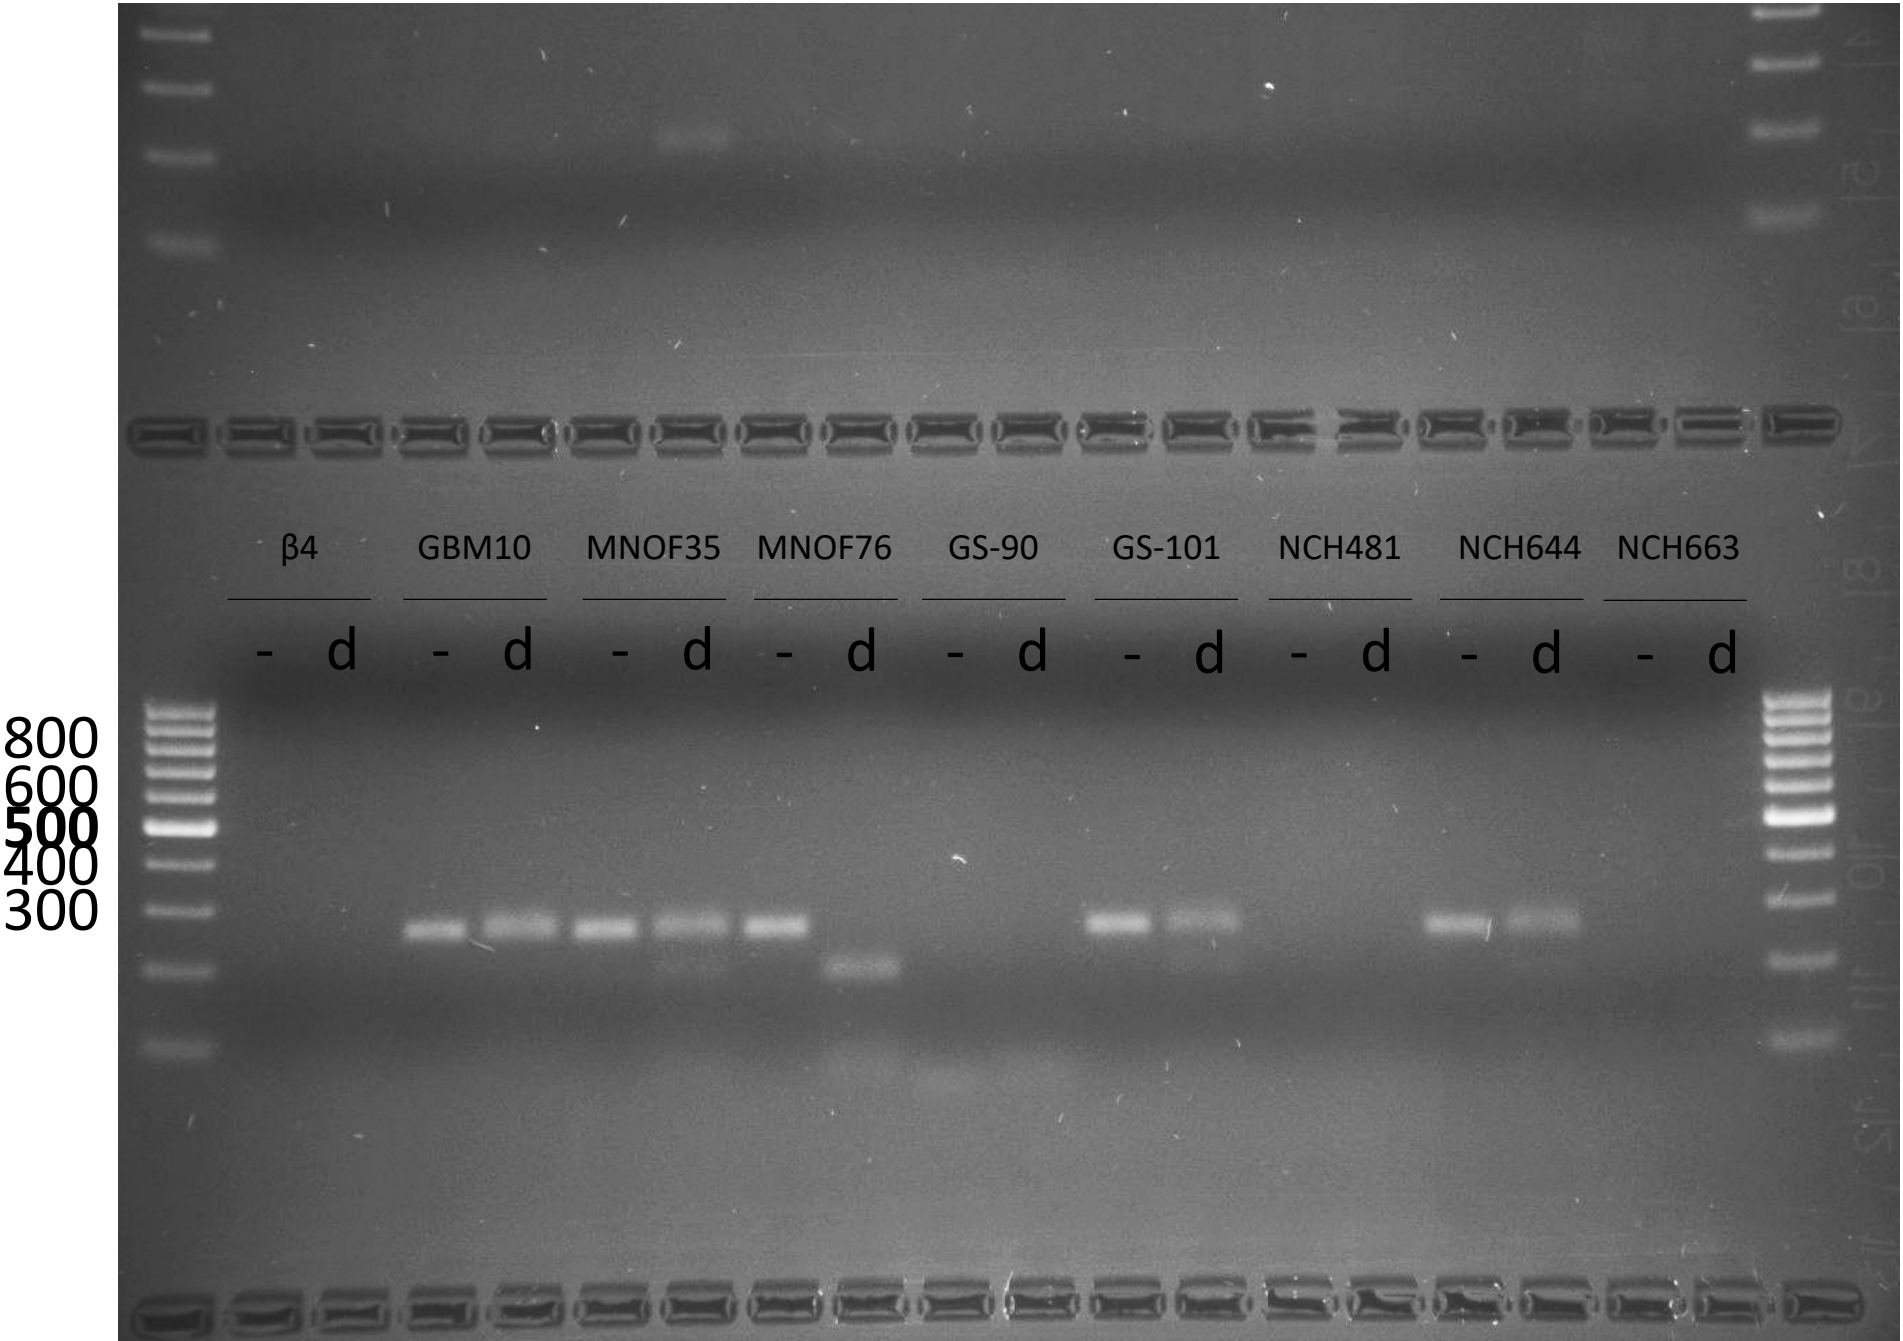

-: undigested; d: digested

Note: A 100 bp ladder was used. For the figure the image was cropped to display GBM10, MNOF35 and MNOF76 representing all VDR polymorphisms

# Related to Figure 2

BsmI

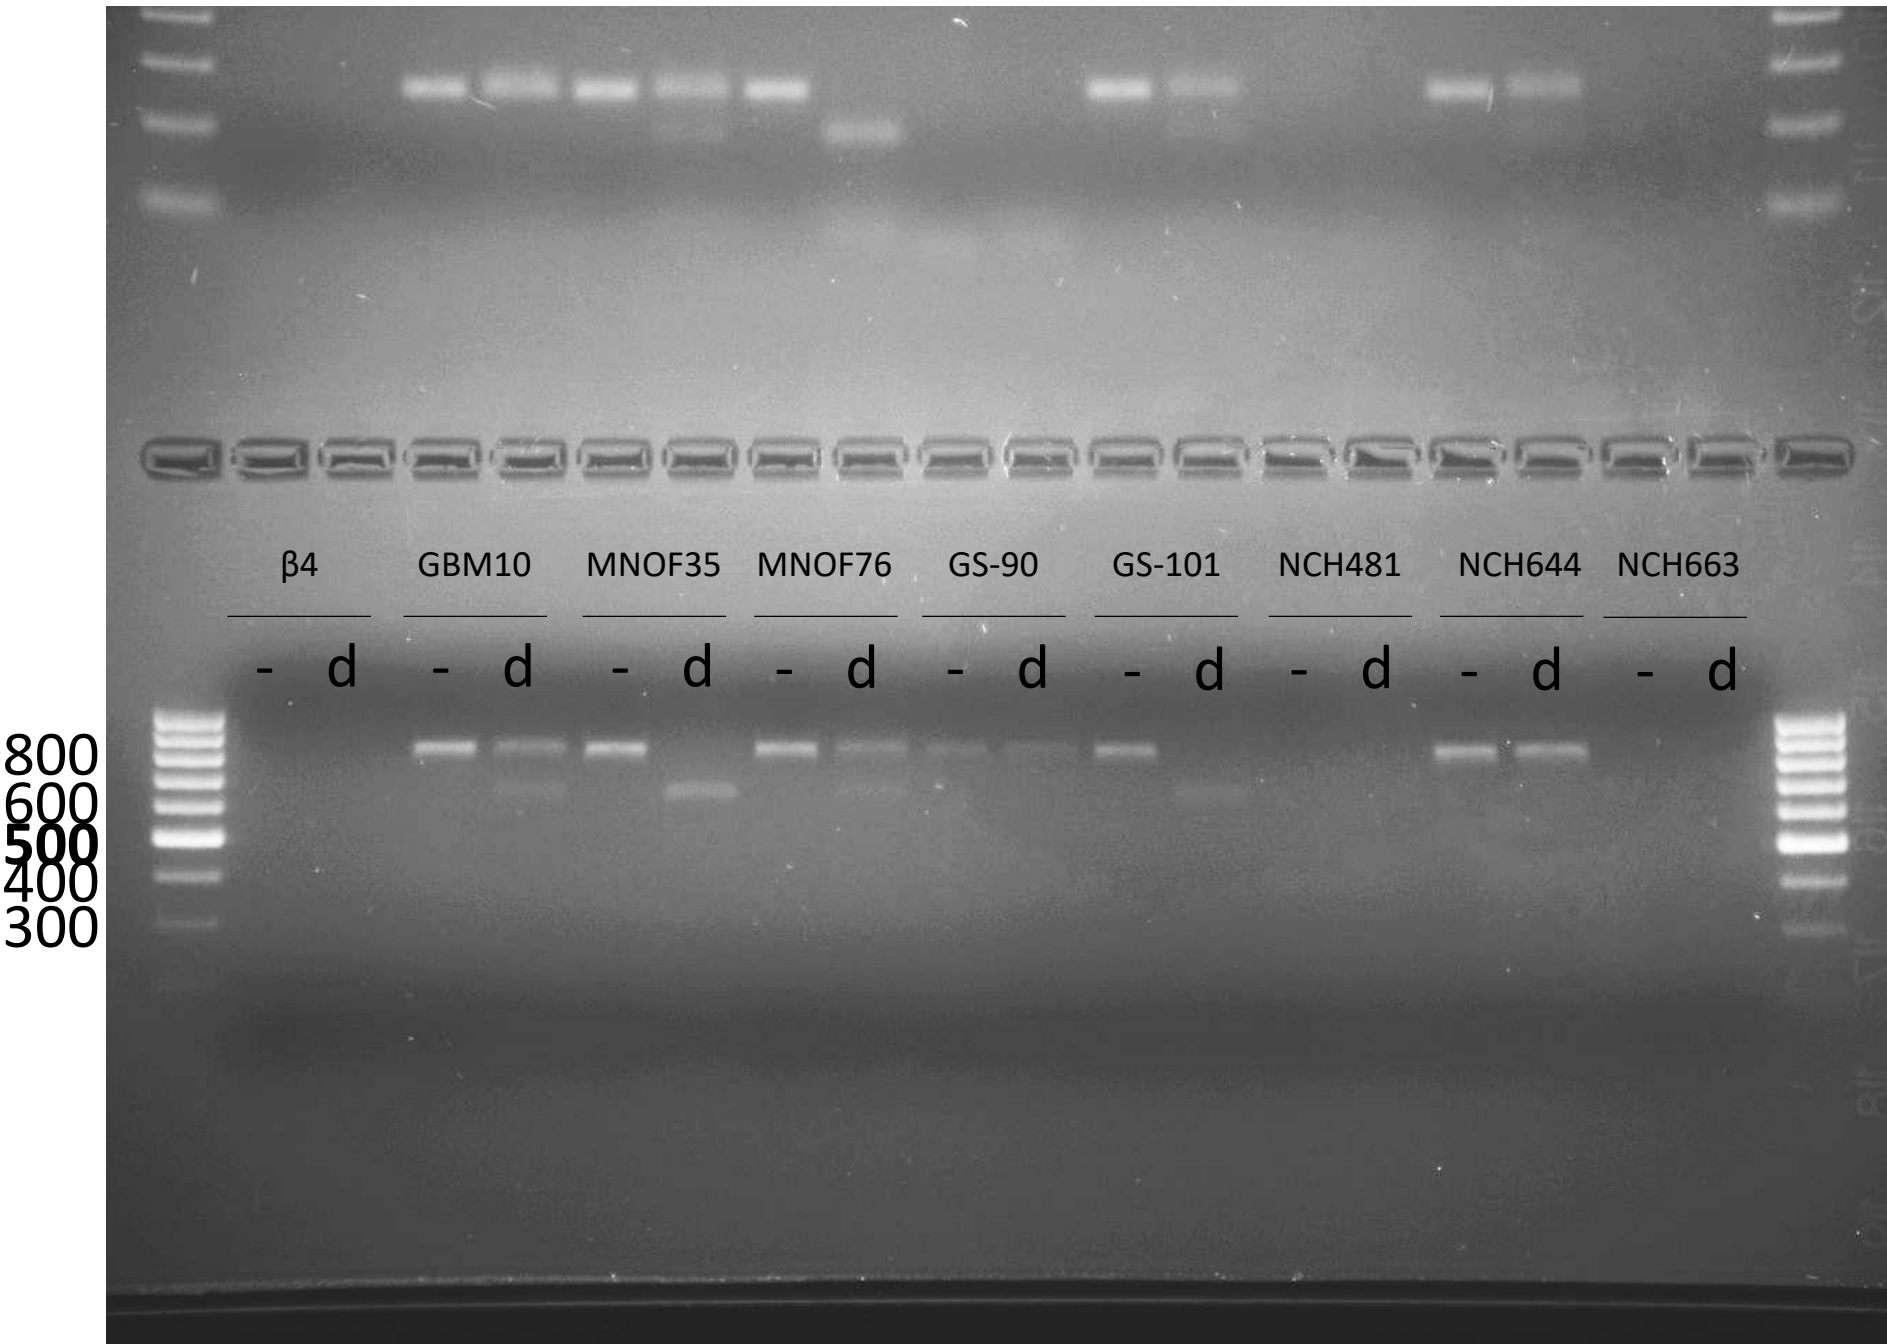

-: undigested; d: digested

Note: A 100 bp ladder was used. For the figure the image was cropped to display GBM10, MNOF35 and MNOF76 representing all VDR polymorphisms

Related to Figure 2

Apal

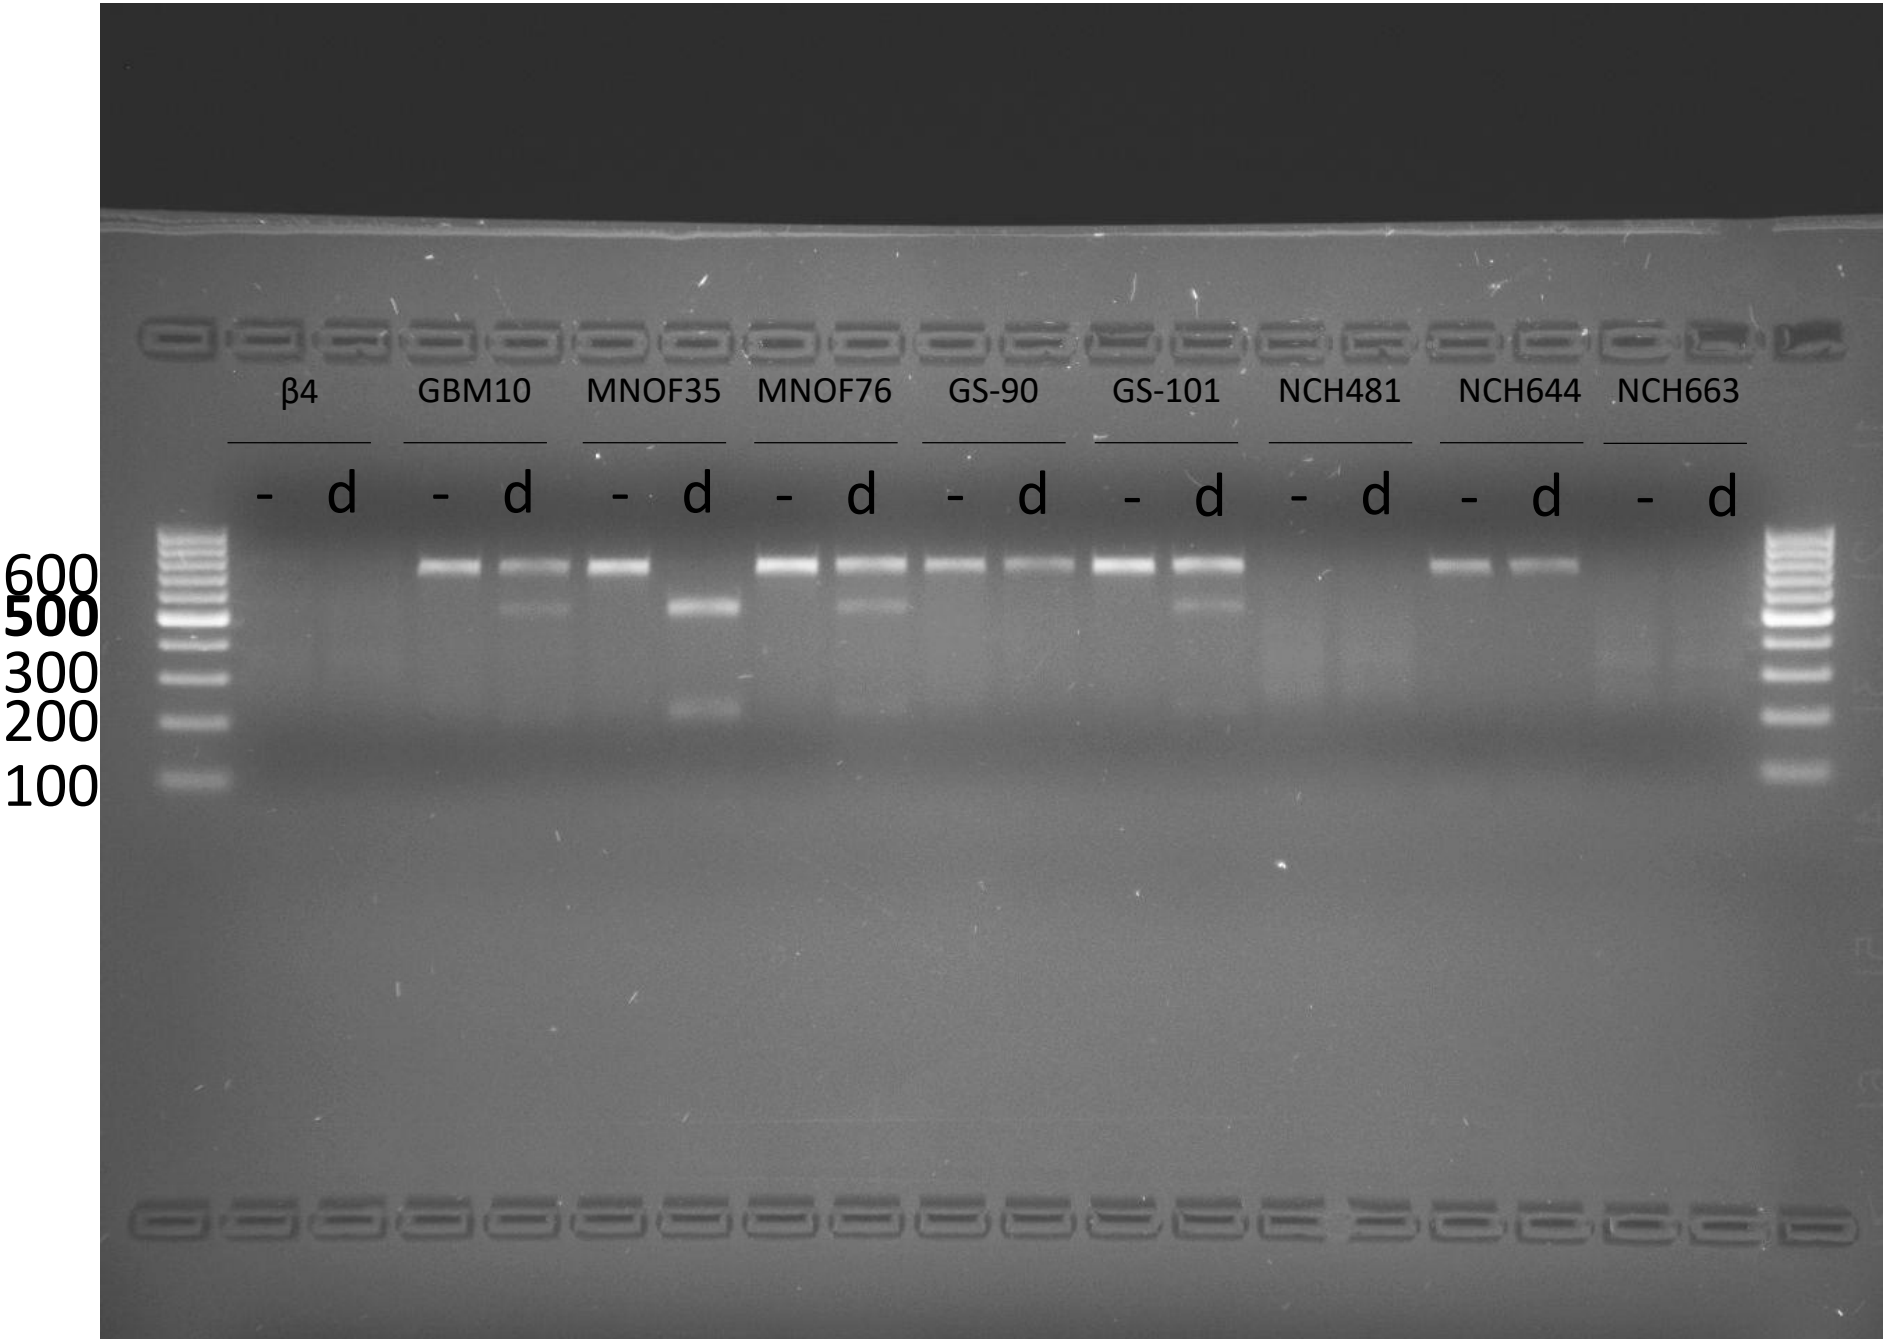

-: undigested; d: digested

Note: A 100 bp ladder was used. For the figure the image was cropped to display GBM10, MNOF35 and MNOF76 representing all VDR polymorphisms

# Related to Figure 2

TaqI

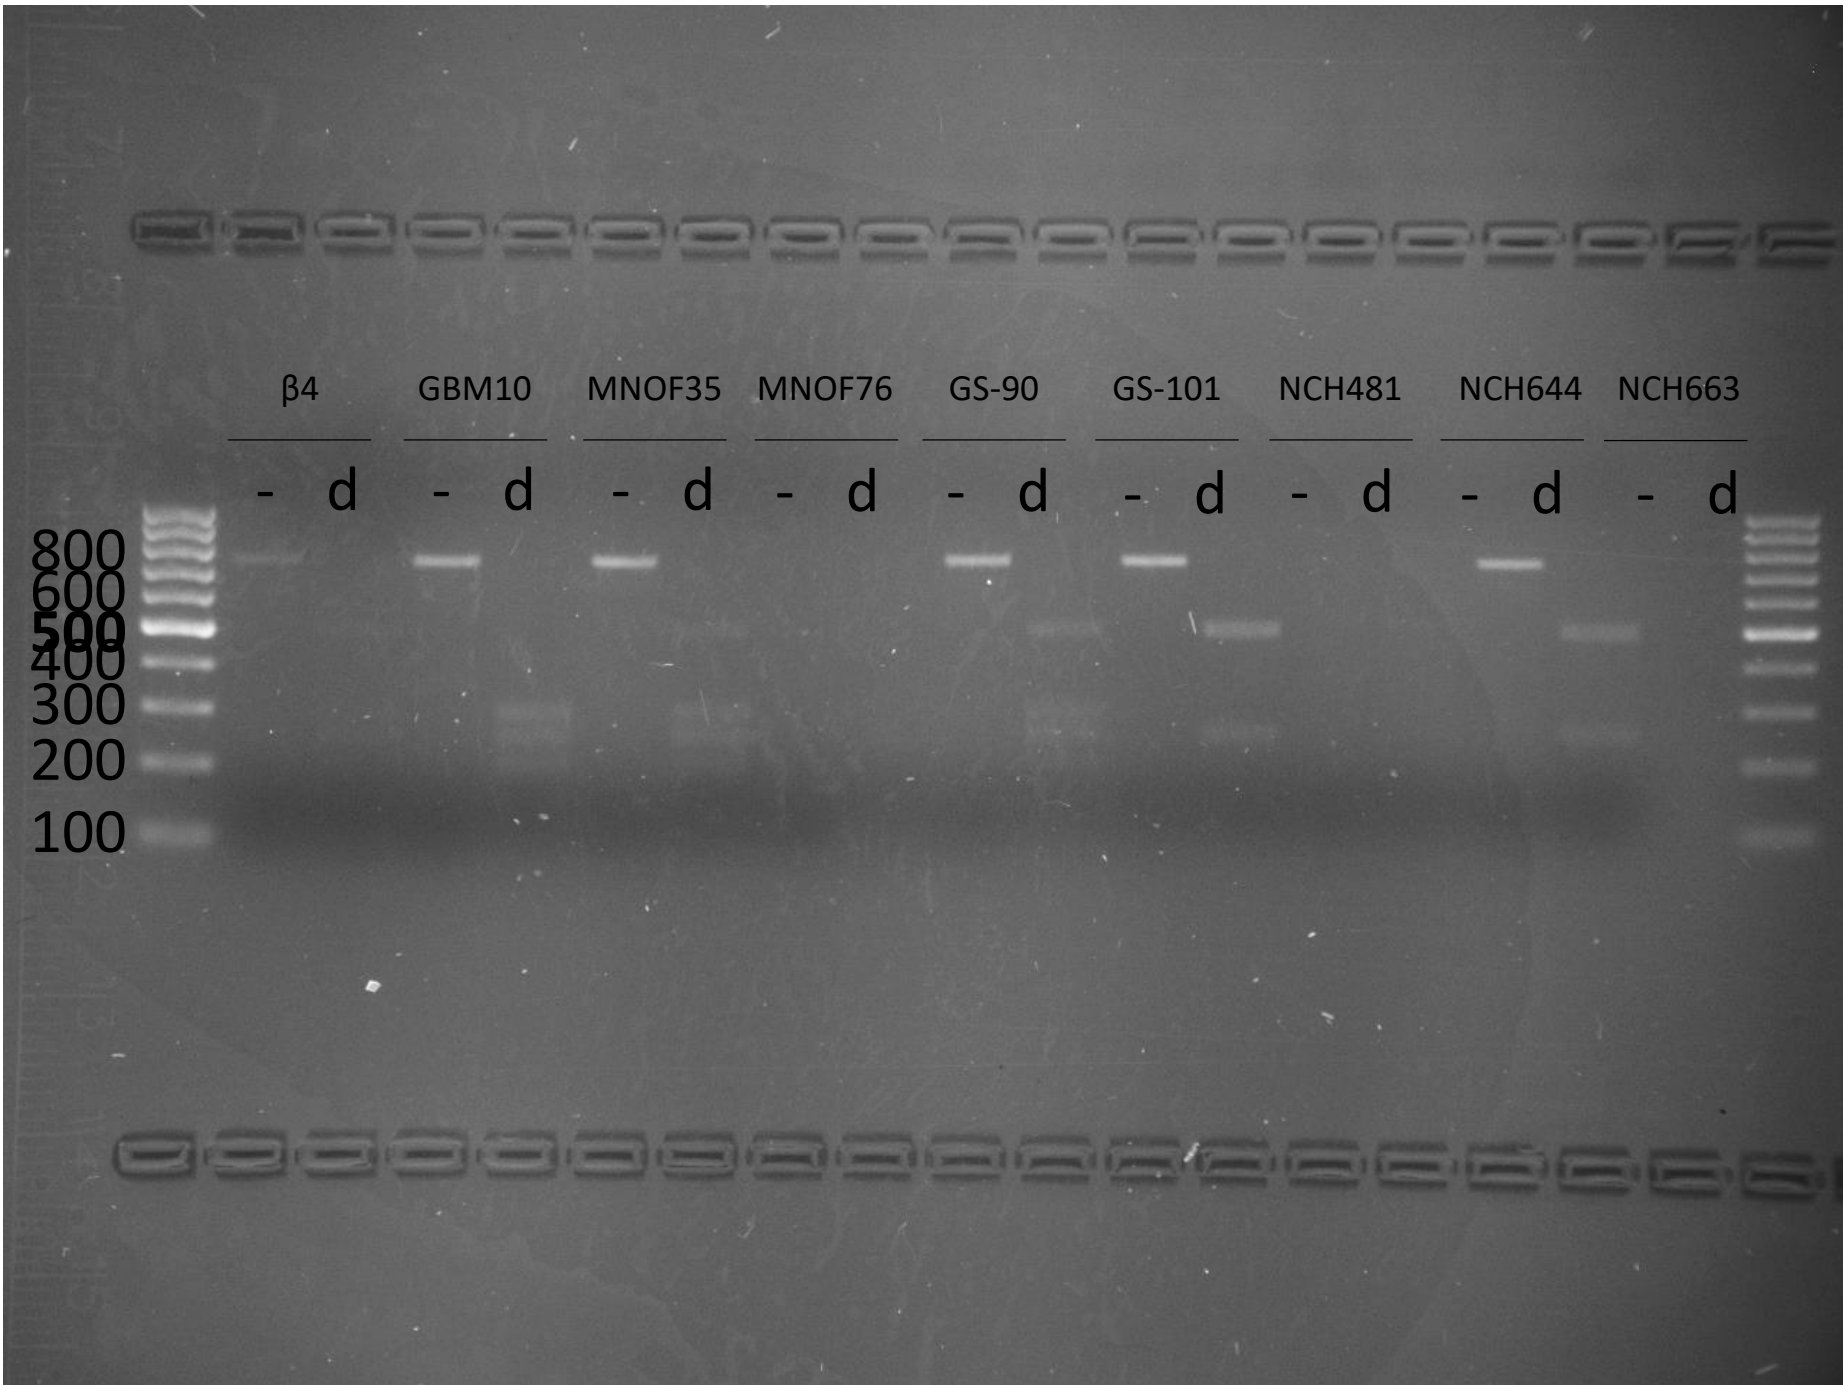

-: undigested; d: digested

Note: A 100 bp ladder was used. For the figure the image was cropped to display GBM10, MNOF35 and MNOF76 representing all VDR polymorphisms
